# Supplementary material
Source: PubMed Central journal article supplement (PMC5621957)
Supplement: supp_5.3.E586_2017-0022_original_submission.pdf [file supp_5.3.E586_2017-0022_original_submission.pdf]

1  
2  
3 **Improved outcomes associated with a pediatric clinical diabetes network: a**  
4 **population-based time-trend analysis in Ontario, Canada**  
5  
6  
7  
8

9  
10 Meranda Nakhla<sup>1,2</sup>, MD MSc; Elham Rahme<sup>2</sup>, PhD; Marc Simard<sup>3</sup>, MSc; Astrid  
11  
12 Guttmann<sup>4,5,6</sup>, MDCM, MSc  
13  
14  
15  
16

17 **Affiliations:** <sup>1</sup> Department of Pediatrics, The Montreal Children's Hospital, McGill  
18  
19 University, Montreal, Quebec, Canada, H4A 3J1 <sup>2</sup> Research Institute of the McGill  
20  
21 University Health Centre, Montreal, Quebec, Canada, H3H 2R9 <sup>3</sup> Institut National de  
22  
23 Santé Publique du Québec, Québec, Québec, Canada, G1V 5B3 <sup>4</sup> Department of  
24  
25 Pediatrics, Hospital for Sick Children, University of Toronto, <sup>5</sup> Institute of Health Policy,  
26  
27 Management and Evaluation, University of Toronto, <sup>6</sup> Institute for Clinical Evaluative  
28  
29 Sciences, Toronto, Ontario, Canada, M4N 3M5  
30  
31  
32  
33  
34  
35

36 **Address correspondence to:** Dr. Astrid Guttmann, Senior Scientist, Chief Science  
37  
38 Officer, Institute for Clinical Evaluative Sciences, G1 06, 2075 Bayview Avenue,  
39  
40 Toronto, Ontario M4N 3M5 Ph. 416-480-4055 ext. 3783, Email:  
41  
42

43 [astrid.guttmann@ices.on.ca](mailto:astrid.guttmann@ices.on.ca)  
44  
45  
46  
47

48 Word Count: 2500  
49  
50  
51  
52  
53  
54  
55  
56  
57  
58  
59  
60

## Abstract

**Background:** To determine the association of implementing a pediatric diabetes network on the risk of acute diabetes-related complications and on the socioeconomic (SES) and geographic disparities in these outcomes.

**Methods:** We conducted a population-based time trend analysis of children (< 18 years) with diabetes (n= 13 806) using health administrative databases in Ontario, Canada from 1996-2011. The relationship between network implementation and diabetes-related emergency department (ED) visits and hospitalizations was determined using linear mixed effects models with a Poisson link function.

**Results:** After network implementation in 2001, there was a significant decrease in the rates of ED-visits (17/ 100 to 10/100 children in 2011,  $P<0.001$ ) and hospitalizations (8.8/100 to 5.0/100 children in 2011,  $P<0.001$ ). This decrease was most significant for those in the lowest SES quintile and in urban areas. Compared with the highest SES, the lowest SES remained at higher risk of ED-visits (adjusted rate ratio [RR<sub>after</sub>]1.77; 95% CI:1.55,2.03) and hospitalizations (RR<sub>after</sub> 2.11; 95% CI: 1.77,2.52) after network implementation. However, the yearly decrease in ED-visits and hospitalization rates for the lowest compared to the highest SES, shifted towards a decreasing disparity after network implementation ( $P<0.05$ ). Before the network, geographic location was not associated with disease outcomes. After network implementation, the risk of ED-visits in urban areas was significantly lower compared to rural areas.

**Interpretation:** The establishment of a diabetes network is associated with better health outcomes, particularly for those of lower SES. Further work is needed to address the healthcare needs of those in rural areas.

**Key words:** Diabetes Mellitus, Type 1; Child; Child, Preschool; Adolescent; Health Services Research, Acute Complications, Socioeconomic Status, Disparities

Confidential

1  
2  
3  
4  
5  
6  
7  
8  
9  
10  
11  
12  
13  
14  
15  
16  
17  
18  
19  
20  
21  
22  
23  
24  
25  
26  
27  
28  
29  
30  
31  
32  
33  
34  
35  
36  
37  
38  
39  
40  
41  
42  
43  
44  
45  
46  
47  
48  
49  
50  
51  
52  
53  
54  
55  
56  
57  
58  
59  
60

## Introduction

The incidence of type 1 diabetes mellitus in children is increasing at a rate of 3-5% per year, representing a growing public health burden (1). Acute complications, such as diabetic ketoacidosis (DKA) and severe hypoglycemia remain the leading cause of avoidable hospitalizations and emergency department (ED) visits among children with type 1 diabetes (2, 3). Regular access to specialized healthcare services is essential in preventing diabetes-related complications (4-7). Low socioeconomic status (SES) and remote geographic location may impede access to services (7-9). Various healthcare delivery models, including clinical networks, have developed to foster continuity of care and equitable access to specialized diabetes services (10). As the management of pediatric diabetes becomes more complex, access to specialized care is increasingly recognized as an important priority (11). However, except for a publicly reported audit from a pediatric diabetes network in the U.K, the effect of clinical networks has been described only in the adult diabetes population (12, 13). Further, the effect of diabetes networks on acute diabetes-related complications and on the SES and geographic disparities in these outcomes has not been evaluated.

In 2001, the Network of Ontario Pediatric Diabetes Programs was established to promote equitable distribution and timely access to quality diabetes care for all children in Ontario, Canada (14). The network, funded through the Ontario Ministry of Health, consists of 35 specialized pediatric diabetes centres. Each centre, at a minimum, provide access to a team consisting of physicians, nurses, dietitians and social workers with training in diabetes care (15). The workforce in these centres varies from generalists (family

1  
2  
3 physicians, pediatricians) to pediatric endocrinologists (academic centres) and all of the  
4  
5 community centres are affiliated with one of the five academic pediatric centres (15). The  
6  
7 overall goal of the network is to promote linkages between the centres, assist with the  
8  
9 development and dissemination of resources and guidelines, provide support and  
10  
11 infrastructure for implementing evidence-based care and for coordinating services, while  
12  
13 promoting consistency in standards of practice through professional development. To  
14  
15 date, accountability measures for the network have not included patient outcomes and are  
16  
17 not publicly reported.  
18  
19  
20  
21

22  
23  
24 The objectives of our study were to determine whether implementation of a diabetes  
25  
26 network was associated with 1) a decrease in the risk of acute diabetes-related  
27  
28 complications, and 2) a reduction in the SES and geographic disparities in these outcomes.  
29  
30  
31  
32  
33  
34  
35  
36  
37  
38  
39  
40  
41  
42  
43  
44  
45  
46  
47  
48  
49  
50  
51  
52  
53  
54  
55  
56  
57  
58  
59  
60

## Methods

### *Study design*

We conducted a population-based time-trend analysis of the acute complications of diabetes using multiple linked health administrative databases from Ontario available at the Institute for Clinical Evaluative Sciences. This study was approved by both the Research Ethics Boards of Sunnybrook Health Sciences Centre and McGill University Health Centre.

We used the Ontario Diabetes Database (ODD), a validated population-based database, to identify all children (ages < 18 years) with a diabetes duration of [at least 1 year](#), living in Ontario from April 1<sup>st</sup>, 1996- March 31<sup>st</sup>, 2011 (16). The database does not distinguish between type 1 and type 2 diabetes; however recent Canadian studies have shown that [most](#) individuals under age 20 with diabetes have type 1 diabetes (15, 17). Once cases enter the database, they remain until death or migration out of Ontario. Using a unique encoded identifier, records were linked to other administrative databases. These databases included the Registered Persons Database (demographic information); the Ontario Health Insurance Plan Database (OHIP) (physicians' billing claims) and; the Canadian Institute for Health Information Hospital Discharge Abstract Database (hospital admissions). Using the individual's postal code for each fiscal year of the study, records were linked to census data to determine neighborhood income quintiles and rural-urban status. Patients with invalid health insurance numbers and missing postal codes were excluded. [Postal codes that are missing are excluded because the dissemination or enumerations areas in](#)

1  
2  
3 which they are located are “unstable” neighbourhoods with frequent migration (student  
4 housing, long-term care homes).  
5  
6  
7  
8  
9

### 10 *Outcome measures*

11  
12 Outcomes were diabetes-related ED-visits and hospitalizations. ED-visits **not resulting in**  
13 **hospitalizations** were identified using OHIP physicians’ service claims bearing a  
14  
15 diagnostic code for diabetes (ICD-9 250) and indicating that the encounter occurred in  
16  
17 the ED. Hospitalizations were identified as those with the most responsible diagnosis  
18  
19 code for hyperglycemia (ICD-9 250.1), including DKA (ICD-9 250.2, ICD-10 10.1-14.1)  
20  
21 and hyperosmolar hyperglycemic coma (ICD-9 250.3, ICD-10 10.0-14.0), and for  
22  
23 hypoglycemia (ICD-9 251, ICD-10 E10.63-E14.63). ICD-10 codes were used for  
24  
25 hospitalizations that occurred after 2001.  
26  
27  
28  
29  
30  
31  
32  
33

### 34 *Explanatory variables*

35  
36 Our exposure was implementation of the diabetes network in 2001. The effect of the  
37  
38 network was measured from 2001 to 2011. The following covariates were determined a  
39  
40 priori: age, sex, SES and urban-rural status. Age was grouped into pre-school (1-4 years),  
41  
42 school age (5-9 years), early adolescent (10-14 years), and late adolescent (15-18 years).  
43  
44 SES was measured using neighborhood income quintiles derived from census-based  
45  
46 median household income levels of an individual’s neighborhood of residence  
47  
48 enumeration (1996) or dissemination (2001) area (population 400-700). Geographic  
49  
50 location of residence was categorized as urban (population  $\geq 10,000$ ) versus rural. Age,  
51  
52  
53 SES and urban-rural status were assigned at the start of each fiscal year.  
54  
55  
56  
57  
58  
59  
60

### *Analysis*

We examined whether rates for diabetes-related ED-visits and hospitalizations changed significantly after network implementation. The numerator was the total number of episodes in each year and the denominator the total number of eligible persons in the ODD in that year.

We estimated the effect of network implementation on ED-visits and hospitalizations using the segmented regression analysis approach (18). We used generalized linear mixed effects models to assess the relationship between network implementation and annual diabetes-related ED-visit and hospitalization rates, respectively. We used aggregate data of annual crude rates for each level of SES, urban-rural status, sex and age. For each model, we used Poisson link and accounted for correlation (compound symmetry structure) within groups over the follow-up period. We determined population average adjusted rate ratios (aRR) by accounting for the number of individuals in each aggregate. For the base model, we created three variables: a continuous variable representing fiscal year (pre-network trend estimate), a dummy variable representing the network implementation (immediate network effect) and an interaction term between network implementation and fiscal year (difference between pre- and post-network trend estimate). We included all the covariates selected a priori and interaction terms between network implementation and SES as well as network implementation and geographic location to determine whether SES and geographic location modified the effect of the diabetes network.



1  
2  
3  
4  
5  
6 To determine if there was a change in the trend of ED-visit or hospitalization annual rates  
7  
8 post-network, and by SES and geographic location, we repeated the multivariate analysis  
9  
10 with the addition of interaction terms between year, network implementation and SES, as  
11  
12 well as year, network implementation and geographic location to the model. From these  
13  
14 models, yearly predicted adjusted rates (modeled rates post-network implementation) and  
15  
16 the projected adjusted rates (rates had the network not been implemented) were  
17  
18 calculated using the means method which involved setting each confounder to its mean  
19  
20 value. We calculated the difference in the predicted adjusted rates between the start of the  
21  
22 network and 2011 using the marginal standardization method with confidence intervals  
23  
24 (CI) determined by using the delta method (19). Statistical tests were two-sided with  
25  
26 significance assigned at  $p < 0.05$ .  
27  
28  
29  
30

31 Statistical analyses were performed using SAS 9.4(SAS Institute, Cary, NC).  
32  
33  
34  
35

## 36 Results

37  
38 There were 14,425 cases of established diabetes identified and of these, 13,806 had valid  
39  
40 postal codes and were included in the final analysis.  
41  
42  
43  
44

### 45 *ED-visits*

46  
47 Figure 1A presents the observed crude rates, as well as the trends in ED-visit rates with  
48  
49 (predicted rates) and without (projected rates) network implementation. Pre-network, ED-  
50  
51 visits remained unchanged (18/100 in 1996, 17/100 in 2001,  $p = 0.15$  for trend). Post-  
52  
53 network, visits decreased to 10 per 100 in 2011( $p < 0.001$  for trend). The decreasing trend  
54  
55  
56  
57  
58  
59  
60

1  
2  
3 in ED-visits post-network was seen across SES quintiles and geographic locations  
4  
5  
6 (Figures 2A and 3A).  
7  
8  
9

10 In the multivariate analysis, lower SES was associated with an increased risk of ED-visits  
11 which persisted post-network (Table 1). Post-network, those living in rural regions had a  
12 20% increased risk of ED-visits compared to urban areas. Male gender was also  
13 associated with a decreased risk in the multivariate analysis (aRR 0.78; 95% CI  
14 0.72,0.84).  
15  
16  
17  
18  
19  
20  
21  
22  
23

24 In the multivariate analysis, we found a significant difference in the overall pre- and post-  
25 network trend estimates, with a significant decrease in the long-term trend in annual rates  
26 post-network compared to trends pre-network (Table 2). This decrease was statistically  
27 significant within the highest SES (Q5), lowest SES (Q1) and urban areas. Although  
28 SES-disparities persisted post-network, the relative yearly decrease in ED-visits in the  
29 lowest compared to the highest SES shifted towards a decreasing disparity (Figure 2A).  
30  
31 Further, the absolute difference in the predicted adjusted rates between Q1 and Q5 in  
32 2011 (5.2%; 95% CI: 3.29%,7.14%) was significantly less than in 2001 (9.3%; 95% CI:  
33 6.12%,12.50%) (Difference: -4.0 %; 95% CI -0.2%, - 8.0%,  $p<0.05$ ).  
34  
35  
36  
37  
38  
39  
40  
41  
42  
43  
44  
45

#### 46 *Hospitalizations*

47 Pre-network, hospitalizations had remained unchanged (8.4/100 in 1996; 8.8/100 in 2001,  
48  $p=0.18$  for trend) (Figure 1B). Post-network, rates decreased to 5.0/100 in 2011 ( $p<0.001$   
49 for trend). As demonstrated in Figure 1B, had the network not been implemented,  
50  
51  
52  
53  
54  
55  
56  
57  
58  
59  
60 hospitalization rates would have increased over time. This decreasing trend in

1  
2  
3 hospitalizations post-network was seen across SES quintiles and urban areas (Figures 2B  
4 and 3B).  
5  
6  
7  
8  
9

10 In the multivariate analysis, hospitalization rates increased with decreasing SES quintile,  
11 pre- and post-network (Table 1). There were no geographic disparities. Other associations  
12 included males (aRR<sub>male</sub> 0.71; 95% CI 0.64,0.78) and older age (10-14 y.o., aRR 1.67;  
13 95% CI:1.23,2.27 and 15-18 y.o., aRR 1.91; 95%CI:1.41,2.59, compared to 1-4 y.o. age  
14 respectively).  
15  
16  
17  
18  
19  
20  
21  
22  
23

24 The network was associated with a 6 % per year decrease in the long-term trend in  
25 hospitalization rates compared to a 3% per year increase pre-network (Table 2). This  
26 decrease was significant within the middle and lowest SES as well as within urban areas.  
27  
28  
29  
30  
31  
32  
33

34 As with ED-visits, the relative yearly decrease in hospitalizations in the lowest compared  
35 to the highest SES, shifted towards a decreasing disparity (Figure 2B); where the absolute  
36 difference in the predicted adjusted rates between Q1 and Q5 decreased from 7.8% (95%  
37 CI 5.4%,10.1%) in 2001 to 3.1% (95% CI 1.7%,4.5%) in 2011 (Difference: -4.7%; 95%  
38 CI -1.8%, -7.6%, p<0.05).  
39  
40  
41  
42  
43  
44  
45  
46  
47

#### 48 Interpretation

49 In this population-based study, efforts of a diabetes network to standardize and improve  
50 access to specialized pediatric diabetes care were associated with better health outcomes,  
51 particularly for those of lower SES. Our work extends previous findings that have  
52  
53  
54  
55  
56  
57  
58  
59  
60

1  
2  
3 highlighted the importance of comprehensive ambulatory care in preventing acute  
4  
5 diabetes-related complications (7, 20). Further, our findings are consistent with those of  
6  
7 another pediatric diabetes network in the U.K., that has demonstrated improvements in  
8  
9 care delivery with implementation of a network model (21). In a recent audit report, the  
10  
11 network reported an increase in the proportion of children that received all recommended  
12  
13 care processes, from 4.1% in 2009/10 to 16% in 2013/14 (21).  
14  
15  
16  
17  
18  
19

20 Research in other pediatric chronic diseases have also shown the positive effect clinical  
21  
22 networks can have on care delivery and outcomes (22). One example, a pediatric  
23  
24 inflammatory bowel disease network, has reported improvements in care processes as  
25  
26 well as an increase in the proportion of patients in remission at follow-up (23, 24).  
27  
28

29 Although these networks may differ with respect to structure, governance, and  
30  
31 accountability mechanisms, results support our findings that clinical networks are  
32  
33 associated with improved care delivery and outcomes.  
34  
35  
36  
37  
38

39 Our finding that those of low SES are most at risk of diabetes-related ED-visits and  
40  
41 hospitalizations within a universal access system supports previous Ontario research (25,  
42  
43 26). Lower income families may be limited in purchasing glucometer strips, potentially  
44  
45 leading to reduced glucose monitoring frequency and an increased risk of poor outcomes  
46  
47 (27). Transportation costs or restrictions in taking time off work may limit lower income  
48  
49 families' abilities to attend diabetes care visits, resulting in missed opportunities for  
50  
51 education and guidance (4, 7).  
52  
53  
54  
55  
56  
57  
58  
59  
60

1  
2  
3 Post-network, we found a significant trend towards decreasing SES-disparities. Children  
4 of lower SES had the greatest improvement in outcomes, suggesting that the network **was**  
5 **most** successful in **possibly** increasing access to effective care for these patients. Older  
6  
7  
8 Canadian data found that visits for primary care were 15% higher in low versus high SES  
9  
10  
11 populations, but an inverse gradient was seen with specialist visits (28). Arguably,  
12  
13 primary care delivery is more accessible in terms of distance and scheduling than  
14  
15  
16 specialized care (28). Thus, by providing more accessible diabetes care, the network may  
17  
18  
19 have reduced some barriers. In addition, the network promoted more equitable  
20  
21  
22 **availability of** other diabetes professionals such as dietitians and nurses which may have  
23  
24  
25 had additional benefits for those of lower SES.  
26  
27  
28

29 Pre-network there were no geographic disparities in outcomes, which contrasts with  
30  
31  
32 previous literature in adults (8, 9). This suggests that either gaps in service delivery  
33  
34  
35 within rural areas existed but other factors such as SES may have been a stronger driver  
36  
37  
38 of complication risk or alternatively access to specialized diabetes care may not have  
39  
40  
41 been an important gap in rural areas as patients travelled to urban centres to receive care.  
42  
43  
44 Post-network, there was an increasing geographic-disparity in ED-visit rates and a  
45  
46  
47 significant decrease in ED-visits and hospitalizations within urban areas but not in rural  
48  
49  
50 areas, suggesting that the network may have improved care more in urban areas as  
51  
52  
53 compared to rural areas. The reason for these findings is unclear and may be related to  
54  
55  
56 differential implementation of diabetes care between rural and urban centres; however,  
57  
58  
59 future research should more closely examine this disparity.  
60

1  
2  
3 Our study has several limitations. Administrative data did not allow us to control for  
4  
5 factors such as haemoglobin A1c (HbA1c) (29) and education level (30), which are  
6  
7 known to contribute to complication risk. Further, we could not measure the effect of the  
8  
9 network on HbA1c. Ambulatory care use was not assessed since some pediatric  
10  
11 subspecialists are salaried and their “shadow” billings data may not be complete.  
12  
13 Availability of additional resources may vary between centres, including 24-hour support,  
14  
15 physician type (endocrinologist, pediatrician) or access to mental health services, which  
16  
17 may result in differing outcomes within the network. Also, improvements in outcomes  
18  
19 occurring over time could have taken place independent of the network and be due to an  
20  
21 increase in the supply of pediatric endocrinologists or advancements in diabetes  
22  
23 management, including insulin pump therapy. However, recent studies of Ontario  
24  
25 children on insulin pumps suggest no significant association on selected outcomes with  
26  
27 diabetes centre resources, including physician type (31). Further, several population-  
28  
29 based studies have demonstrated that despite improvements in HbA1c, trends for  
30  
31 diabetes-related hospitalizations among children with diabetes have remained stable over  
32  
33 a similar time period (1995-2009(32), 1993-2004(33), 2005-2010(34)). Although, we  
34  
35 could not capture treatment modalities with administrative data, it is unlikely that  
36  
37 advancements in care, much of which rely on more intensive management, would have  
38  
39 had a greater impact on outcomes for lower income children (31, 35). Previous Ontario  
40  
41 studies have shown that low income children were less likely to be on pumps and those  
42  
43 on pumps and of lower income had an increased risk of DKA compared to higher income  
44  
45 children (31, 35).  
46  
47  
48  
49  
50  
51  
52  
53  
54  
55  
56  
57  
58  
59  
60

1  
2  
3 Within a universal access health system, the establishment of a diabetes network was  
4 associated with improvements in diabetes-related ED-visit and hospitalization rates as  
5 well as with decreasing SES disparities in these outcomes. This has implications for  
6 health policy efforts in other jurisdictions that are aimed at improving the quality of care  
7 for pediatric diabetes populations. Future work should include comparative effectiveness  
8 studies of the differing models of care within the network including cost-effectiveness  
9 analyses.  
10  
11  
12  
13  
14  
15  
16  
17  
18  
19  
20  
21  
22  
23  
24  
25  
26  
27  
28  
29  
30  
31  
32  
33  
34  
35  
36  
37  
38  
39  
40  
41  
42  
43  
44  
45  
46  
47  
48  
49  
50  
51  
52  
53  
54  
55  
56  
57  
58  
59  
60

Confidential

## Abbreviations

aRR-adjusted Rate Ratio

CI- Confidence Intervals

DKA- Diabetic Ketoacidosis

ED- Emergency Department

ICD-9, 10-International Classification of Diseases, Ninth Revision, Tenth Revision

ODD- Ontario Diabetes Database

OHIP- Ontario Health Insurance Plan

## Contributors' Statement

Meranda Nakhla conceptualized and designed the study, provided oversight of the analysis and interpreted the data, drafted the initial manuscript, and approved the final manuscript as submitted.

Elham Rahme conceptualized and designed the study, provided oversight of the analysis and interpreted the data, critically reviewed and revised the manuscript, and approved the final manuscript as submitted.

Marc Simard contributed to the study conception and design, carried out the analysis, contributed to interpretation of the data, critically reviewed and revised the manuscript, and approved the final manuscript as submitted.

Astrid Guttmann conceptualized and designed the study, provided oversight of the analysis and interpreted the data, critically reviewed and revised the manuscript, and approved the final manuscript as submitted.

All authors are accountable for all aspects of the study.



## Acknowledgements

**Funding Source :** Dr. Nakhla holds a Fonds de recherche du Québec–Santé (FRQS) Junior Clinician-Scientist Award. Dr. Guttmann receives salary support from a CIHR Applied Chair in Reproductive and Child Health Services and Policy Research. This research was supported by Dr. Nakhla’s start-up grant from the Research Institute of the McGill University Health Centre. The funders played no role in the conduct of the study, collection of data, management of the study, analysis of data, interpretation of data, or preparation of the manuscript. This study was supported by the Institute for Clinical Evaluative Sciences (ICES), which is funded by an annual grant from the Ontario Ministry of Health and Long-Term Care (MOHLTC). The opinions, results and conclusions reported in this paper are those of the authors and are independent from the funding sources. No endorsement by ICES or the Ontario MOHLTC is intended or should be inferred. Parts of this material are based on data and information compiled and provided by CIHI. However, the analyses, conclusions, opinions and statements expressed herein are those of the authors, and not necessarily those of CIHI.

## Conflicts of Interest

The authors have no conflicts of interest to disclose.

## References

1. Patterson CC, Dahlquist GG, Gyurus E, Green A, Soltesz G. Incidence trends for childhood type 1 diabetes in Europe during 1989-2003 and predicted new cases 2005-20: a multicentre prospective registration study. *Lancet*. 2009;373(9680):2027-33.
2. Dahlquist G, Kallen B. Mortality in childhood-onset type 1 diabetes: a population-based study. *Diabetes Care*. 2005;28(10):2384-7.
3. Tieder JS, McLeod L, Keren R, Luan X, Localio R, Mahant S, et al. Variation in resource use and readmission for diabetic ketoacidosis in children's hospitals. *Pediatrics*. 2013;132(2):229-36.
4. Phan TL, Hossain J, Lawless S, Werk LN. Quarterly visits with glycated hemoglobin monitoring: the sweet spot for glycemic control in youth with type 1 diabetes. *Diabetes Care*. 2014;37(2):341-5.
5. Measures of Pediatric Health Care Quality Based on Hospital Administrative Data: The Pediatric Quality Indicators. 2006 February 2006.
6. Robbins JM, Thatcher GE, Webb DA, Valdmanis VG. Nutritionist visits, diabetes classes, and hospitalization rates and charges: the Urban Diabetes Study. *Diabetes Care*. 2008;31(4):655-60.
7. Jacobson AM, Hauser ST, Willett J, Wolfsdorf JI, Herman L. Consequences of irregular versus continuous medical follow-up in children and adolescents with insulin-dependent diabetes mellitus. *J Pediatr*. 1997;131(5):727-33.

- 1  
2  
3 8. Curtis JR, To T, Muirhead S, Cummings E, Daneman D. Recent trends in  
4 hospitalization for diabetic ketoacidosis in ontario children. *Diabetes Care*.  
5  
6 2002;25(9):1591-6.  
7
- 8  
9  
10 9. Booth GL, Hux JE, Fang J, Chan BT. Time trends and geographic disparities in  
11 acute complications of diabetes in Ontario, Canada. *Diabetes Care*. 2005;28(5):1045-50.  
12
- 13  
14 10. Cropper S, Hopper A, Spencer SA. Managed clinical networks. *Arch Dis Child*.  
15  
16 2002;87(1):1-4; discussion 1-4.  
17
- 18  
19 11. Edge J. Regional networks for children's diabetes care. *Practical Diabetes*.  
20  
21 2010;27(4).  
22
- 23  
24 12. Greene A, Pagliari C, Cunningham S, Donnan P, Evans J, Emslie-Smith A, et al.  
25  
26 Do managed clinical networks improve quality of diabetes care? Evidence from a  
27 retrospective mixed methods evaluation. *Qual Saf Health Care*. 2009;18(6):456-61.  
28
- 29  
30 13. McKnight J. The Scottish Diabetes Improvement Plan. *The British Journal of*  
31  
32 *Diabetes and Vascular Disease*. 2015;15(3).  
33
- 34  
35 14. Beauvais C, Griffis S. A System-wide Response to Diabetes: Networks Meet the  
36  
37 Challenge. *Canadian Journal of Diabetes*. 2007:16-7.  
38
- 39  
40 15. Shulman R, Miller FA, Stukel T, Daneman D, Guttman A. Resources and  
41  
42 population served: a description of the Ontario Paediatric Diabetes Network. *Canadian*  
43  
44 *Medical Association Journal Open*  
45  
46 . 2016;4(2).  
47
- 48  
49  
50 16. Guttman A, Nakhla M, Henderson M, To T, Daneman D, Cauch-Dudek K, et al.  
51  
52 Validation of a health administrative data algorithm for assessing the epidemiology of  
53  
54 diabetes in Canadian children. *Pediatr Diabetes*. 2009.  
55  
56  
57  
58  
59  
60

- 1  
2  
3  
4  
5  
6  
7  
8  
9  
10  
11  
12  
13  
14  
15  
16  
17  
18  
19  
20  
21  
22  
23  
24  
25  
26  
27  
28  
29  
30  
31  
32  
33  
34  
35  
36  
37  
38  
39  
40  
41  
42  
43  
44  
45  
46  
47  
48  
49  
50  
51  
52  
53  
54  
55  
56  
57  
58  
59  
60
17. Amed S, Dean HJ, Panagiotopoulos C, Sellers EA, Hadjiyannakis S, Laubscher TA, et al. Type 2 diabetes, medication-induced diabetes, and monogenic diabetes in Canadian children: a prospective national surveillance study. *Diabetes Care*. 2010;33(4):786-91.
18. Wagner AK, Soumerai SB, Zhang F, Ross-Degnan D. Segmented regression analysis of interrupted time series studies in medication use research. *J Clin Pharm Ther*. 2002;27(4):299-309.
19. Zou GY. Confidence intervals for the 50 per cent response dose by D. Faraggi, P. Izikson and B. Reiser, *Statistics in Medicine* 2003; 22(12):1977-1988. *Stat Med*. 2009;28(11):1641-2.
20. Drozda DJ, Dawson VA, Long DJ, Freson LS, Sperling MA. Assessment of the effect of a comprehensive diabetes management program on hospital admission rates of children with diabetes mellitus. *Diabetes Educ*. 1990;16(5):389-93.
21. National Paediatric Diabetes Audit 2013-14 Report 1: Processes and Outcomes. 2015.
22. Billett AL, Colletti RB, Mandel KE, Miller M, Muething SE, Sharek PJ, et al. Exemplar pediatric collaborative improvement networks: achieving results. *Pediatrics*. 2013;131 Suppl 4:S196-203.
23. Crandall WV, Boyle BM, Colletti RB, Margolis PA, Kappelman MD. Development of process and outcome measures for improvement: lessons learned in a quality improvement collaborative for pediatric inflammatory bowel disease. *Inflamm Bowel Dis*. 2011;17(10):2184-91.

- 1  
2  
3  
4  
5  
6  
7  
8  
9  
10  
11  
12  
13  
14  
15  
16  
17  
18  
19  
20  
21  
22  
23  
24  
25  
26  
27  
28  
29  
30  
31  
32  
33  
34  
35  
36  
37  
38  
39  
40  
41  
42  
43  
44  
45  
46  
47  
48  
49  
50  
51  
52  
53  
54  
55  
56  
57  
58  
59  
60
24. Crandall WV, Margolis PA, Kappelman MD, King EC, Pratt JM, Boyle BM, et al. Improved outcomes in a quality improvement collaborative for pediatric inflammatory bowel disease. *Pediatrics*. 2012;129(4):e1030-41.
25. Nakhla M, Daneman D, To T, Paradis G, Guttmann A. Transition to adult care for youths with diabetes mellitus: findings from a Universal Health Care System. *Pediatrics*. 2009;124(6):e1134-41.
26. Booth GL, Hux JE. Relationship between avoidable hospitalizations for diabetes mellitus and income level. *Arch Intern Med*. 2003;163(1):101-6.
27. Wood JR, Miller KM, Maahs DM, Beck RW, DiMeglio LA, Libman IM, et al. Most youth with type 1 diabetes in the T1D Exchange Clinic Registry do not meet American Diabetes Association or International Society for Pediatric and Adolescent Diabetes clinical guidelines. *Diabetes Care*. 2013;36(7):2035-7.
28. Roos NP, Mustard CA. Variation in health and health care use by socioeconomic status in Winnipeg, Canada: does the system work well? Yes and no. *Milbank Q*. 1997;75(1):89-111.
29. Rewers A, Chase HP, Mackenzie T, Walravens P, Roback M, Rewers M, et al. Predictors of acute complications in children with type 1 diabetes. *Jama*. 2002;287(19):2511-8.
30. Icks A, Rosenbauer J, Strassburger K, Grabert M, Giani G, Holl RW. Persistent social disparities in the risk of hospital admission of paediatric diabetic patients in Germany-prospective data from 1277 diabetic children and adolescents. *Diabet Med*. 2007;24(4):440-2.

- 1  
2  
3 31. Shulman R, Stukel TA, Miller FA, Newman A, Daneman D, Guttman A. Insulin  
4 pump use and discontinuation in children and teens: a population-based cohort study in  
5 Ontario, Canada. *Pediatr Diabetes*. 2017;18(1):33-44.  
6  
7  
8  
9  
10 32. Rosenbauer J, Dost A, Karges B, Hungele A, Stahl A, Bachle C, et al. Improved  
11 metabolic control in children and adolescents with type 1 diabetes: a trend analysis using  
12 prospective multicenter data from Germany and Austria. *Diabetes Care*. 2012;35(1):80-6.  
13  
14  
15  
16  
17 33. Lee JM, Okumura MJ, Freed GL, Menon RK, Davis MM. Trends in  
18 hospitalizations for diabetes among children and young adults: United States, 1993-2004.  
19  
20  
21  
22 *Diabetes Care*. 2007;30(12):3035-9.  
23  
24  
25 34. Torio CM, Elixhauser A, Andrews RM. Trends in Potentially Preventable  
26 Hospital Admissions among Adults and Children, 2005-2010: Statistical Brief #151.  
27  
28  
29  
30  
31  
32  
33  
34  
35  
36  
37  
38  
39  
40  
41  
42  
43  
44  
45  
46  
47  
48  
49  
50  
51  
52  
53  
54  
55  
56  
57  
58  
59  
60
- Healthcare Cost and Utilization Project (HCUP) Statistical Briefs. Rockville (MD)2006.
35. Shulman R, Stukel TA, Miller FA, Newman A, Daneman D, Wasserman JD, et al.  
Low socioeconomic status is associated with adverse events in children and teens on  
insulin pumps under a universal access program: a population-based cohort study. *BMJ  
Open Diabetes Res Care*. 2016;4(1):e000239.

1  
2  
3 **Figure 1.** Crude rate, white square; projected adjusted rates (without network  
4 implementation), dotted line; predicted adjusted rates (with network implementation),  
5  
6 solid line.  
7  
8  
9

10  
11  
12 **Figure 2.** Crude rate Q1 (low SES), white squares; projected adjusted rates Q1 (low SES),  
13 dotted line; predicted adjusted rates Q1 (low SES), black squares; crude rate Q5 (high  
14 SES), white circles; projected adjusted rates Q5 (high SES), dashed line; predicted  
15 adjusted rates Q5 (high SES), black circles.  
16  
17  
18  
19  
20  
21

22  
23  
24 **Figure 3.** Crude rate rural, white squares; projected adjusted rates rural, dotted line;  
25 predicted adjusted rural, black squares; crude rate urban, white circles; projected adjusted  
26 rates urban, dashed line; predicted adjusted rates urban, black circles.  
27  
28  
29  
30  
31  
32  
33  
34  
35  
36  
37  
38  
39  
40  
41  
42  
43  
44  
45  
46  
47  
48  
49  
50  
51  
52  
53  
54  
55  
56  
57  
58  
59  
60

**Table 1**-Risk of diabetes-related ED-visits and hospitalizations by SES and geographic locations before and after network implementation (n=13 806)

|                            | Pre-Network |       |      | Post-Network |       |      | Difference |
|----------------------------|-------------|-------|------|--------------|-------|------|------------|
|                            | Adjusted RR | 95%CI |      | Adjusted RR  | 95%CI |      | p-value*   |
| <b>ED-VISITS</b>           |             |       |      |              |       |      |            |
| <b>SES</b>                 |             |       |      |              |       |      |            |
| Q1 (Lowest)                | 1.60        | 1.36  | 1.89 | 1.77         | 1.55  | 2.03 | 0.25       |
| Q2                         | 1.49        | 1.26  | 1.75 | 1.48         | 1.28  | 1.70 | 0.94       |
| Q3                         | 1.20        | 1.02  | 1.41 | 1.25         | 1.09  | 1.44 | 0.64       |
| Q4                         | 1.14        | 0.97  | 1.34 | 1.23         | 1.07  | 1.41 | 0.39       |
| Q5 (highest)               | 1.00        | -     |      | 1.00         | -     |      | -          |
| <b>Geographic location</b> |             |       |      |              |       |      |            |
| Rural                      | 0.93        | 0.80  | 1.07 | 1.20         | 1.06  | 1.34 | 0.001      |
| Urban                      | 1.00        | -     |      | 1.00         | -     |      | -          |
| <b>HOSPITALIZATIONS</b>    |             |       |      |              |       |      |            |
| <b>SES</b>                 |             |       |      |              |       |      |            |
| Q1 (Lowest)                | 2.40        | 1.91  | 3.03 | 2.11         | 1.77  | 2.52 | 0.31       |
| Q2                         | 1.76        | 1.38  | 2.24 | 1.73         | 1.44  | 2.08 | 0.90       |
| Q3                         | 1.47        | 1.16  | 1.87 | 1.44         | 1.19  | 1.74 | 0.89       |
| Q4                         | 1.21        | 0.95  | 1.54 | 1.33         | 1.11  | 1.60 | 0.47       |
| Q5 (Highest)               | 1.00        | -     |      | 1.00         | -     |      | -          |
| <b>Geographic location</b> |             |       |      |              |       |      |            |
| Rural                      | 0.92        | 0.75  | 1.12 | 0.93         | 0.80  | 1.10 | 0.86       |
| Urban                      | 1.00        | -     |      | 1.00         | -     |      | -          |

\*p-value represents significance testing of difference in adjusted RRs before and after implementation of diabetes network

**Other variables in the multivariate model:** Sex, age group, fiscal year, dummy variable network implementation, fiscal year\* network implementation, SES\* network implementation, geographic location\*network implementation



**Table 2-** Adjusted annual trend in diabetes-related ED-visits and hospitalizations before and after network implementation

|                            | Pre-Network |       |      | Post-Network |       |      | Difference |
|----------------------------|-------------|-------|------|--------------|-------|------|------------|
|                            | Adjusted RR | 95%CI |      | Adjusted RR  | 95%CI |      | p-value*   |
| <b>ED-VISITS</b>           |             |       |      |              |       |      |            |
| <b>Overall</b>             | 0.99        | 0.97  | 1.01 | 0.94         | 0.93  | 0.95 | <0.001     |
| <b>SES</b>                 |             |       |      |              |       |      |            |
| Q1                         | 1.01        | 0.97  | 1.06 | 0.94         | 0.92  | 0.96 | 0.009      |
| Q2                         | 0.98        | 0.94  | 1.03 | 0.95         | 0.93  | 0.97 | 0.27       |
| Q3                         | 0.95        | 0.91  | 0.99 | 0.94         | 0.92  | 0.96 | 0.69       |
| Q4                         | 0.99        | 0.95  | 1.03 | 0.93         | 0.92  | 0.95 | 0.04       |
| Q5                         | 0.99        | 0.95  | 1.04 | 0.93         | 0.91  | 0.96 | 0.04       |
| <b>Geographic location</b> |             |       |      |              |       |      |            |
| Rural                      | 1.01        | 0.96  | 1.06 | 0.96         | 0.94  | 0.98 | 0.17       |
| Urban                      | 0.98        | 0.96  | 1.00 | 0.94         | 0.93  | 0.95 | 0.001      |
| <b>HOSPITALIZATIONS</b>    |             |       |      |              |       |      |            |
| <b>Overall</b>             | 1.03        | 1.01  | 1.06 | 0.94         | 0.93  | 0.95 | <0.001     |
| <b>SES</b>                 |             |       |      |              |       |      |            |
| Q1                         | 1.03        | 0.97  | 1.09 | 0.93         | 0.91  | 0.95 | 0.01       |
| Q2                         | 1.03        | 0.97  | 1.10 | 0.96         | 0.93  | 0.98 | 0.08       |
| Q3                         | 1.08        | 1.01  | 1.15 | 0.93         | 0.90  | 0.95 | 0.005      |
| Q4                         | 1.00        | 0.94  | 1.07 | 0.96         | 0.93  | 0.99 | 0.28       |
| Q5                         | 1.04        | 0.96  | 1.12 | 0.95         | 0.92  | 0.98 | 0.07       |
| <b>Geographic location</b> |             |       |      |              |       |      |            |
| Rural                      | 0.96        | 0.89  | 1.03 | 0.97         | 0.94  | 1.01 | 0.87       |
| Urban                      | 1.05        | 1.01  | 1.08 | 0.94         | 0.93  | 0.95 | <0.001     |

Abbreviations: RR, rate ratio; CI, Confidence Interval

\* p-value represents significance testing of difference in adjusted year trends before and after implementation of diabetes network

Other variables in the model: Sex, Age group; and interaction terms fiscal year\*network implementation\*SES and fiscal year\*network implementation\*geographic location

Figure 1: Rates of diabetes-related ED-visits and hospitalizations per 100 children aged 0-19 years in Ontario for 1996-2011. A: Rates of diabetes-related ED-visits. B: Rates of diabetes-related hospitalizations. Crude rate, white square; projected adjusted rates (without network implementation), dotted line; predicted adjusted rates (with network implementation), solid line.

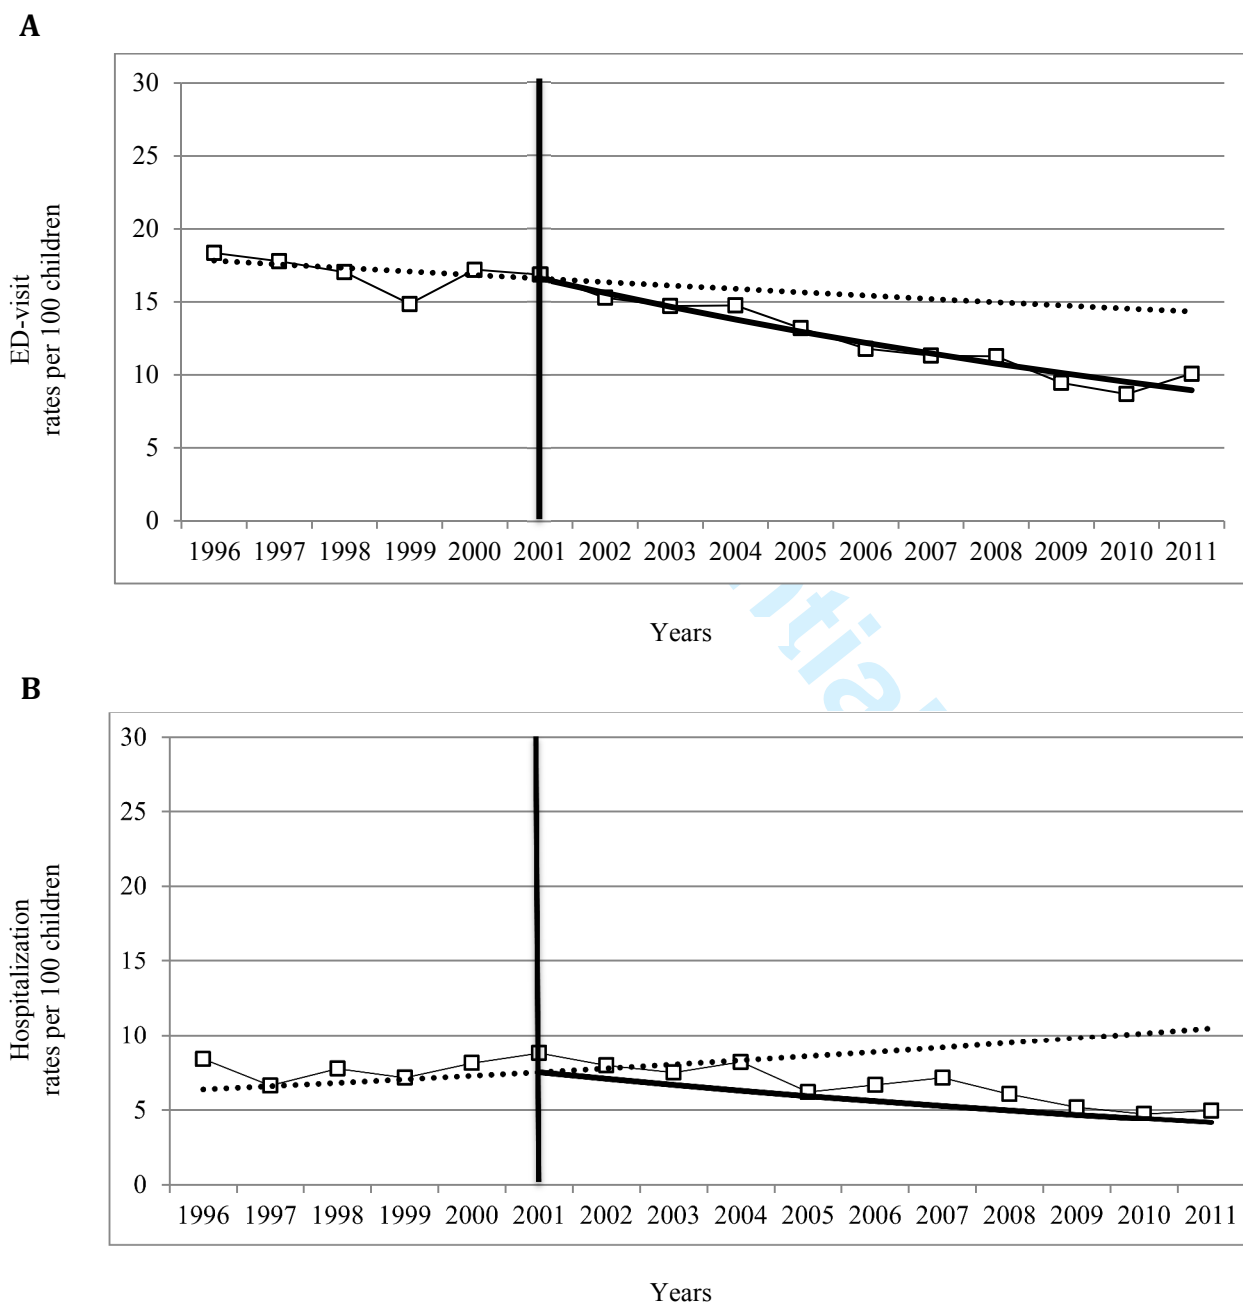

1  
2  
3  
4  
5  
6  
7  
8  
9  
10  
11  
12  
13  
14  
15  
16  
17  
18  
19  
20  
21  
22  
23  
24  
25  
26  
27  
28  
29  
30  
31  
32  
33  
34  
35  
36  
37  
38  
39  
40  
41  
42  
43  
44  
45  
46  
47  
48  
49  
50  
51  
52  
53  
54  
55  
56  
57  
58  
59  
60

Figure 2: Rates of diabetes-related ED visits and hospitalizations per 100 children aged 0-19 years in Ontario for 1996-2011 by income quintile. A: Rates of diabetes-related ED-visits. B: Rates of diabetes-related hospitalizations. Crude rate Q1 (low SES), white squares; projected adjusted rates Q1 (low SES), dotted line; predicted adjusted rates Q1 (low SES), black squares; crude rate Q5 (high SES), white circles; projected adjusted rates Q5 (high SES), dashed line; predicted adjusted rates Q5 (high SES), black circles.

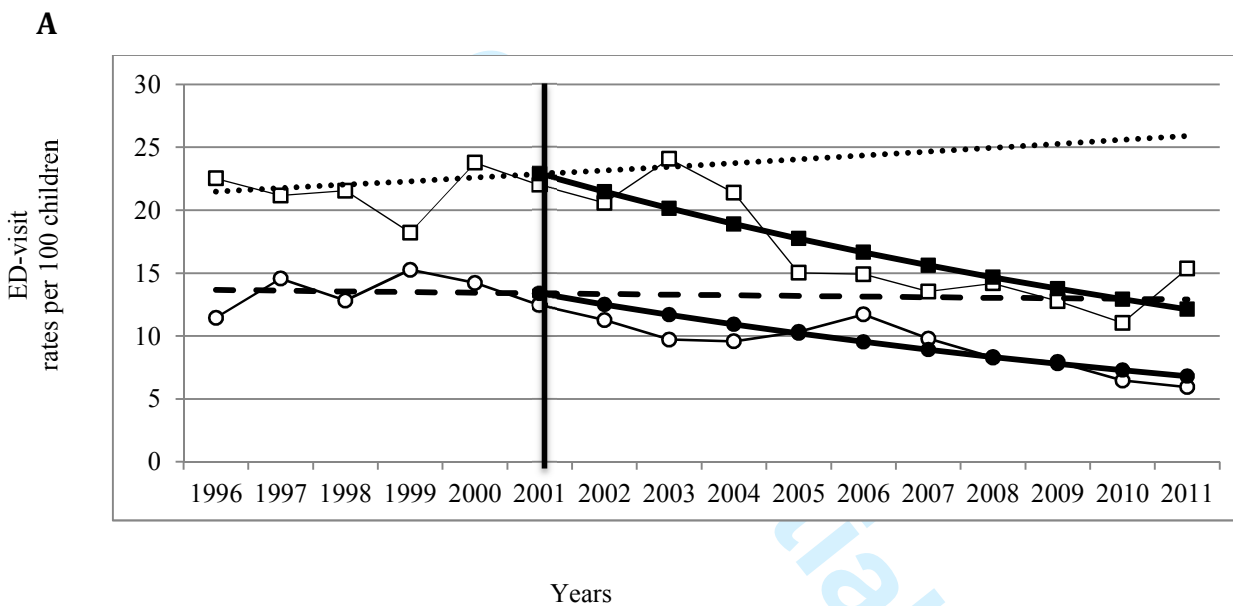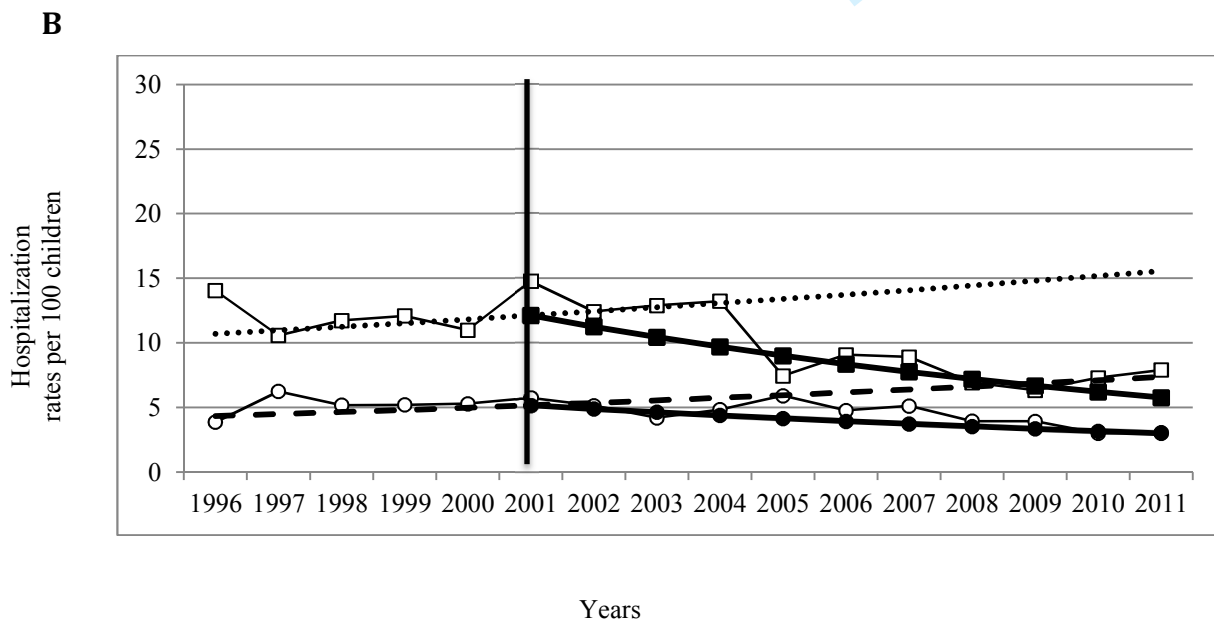

Figure 3: Rates of diabetes-related ED visits and hospitalizations per 100 children aged 0-19 years in Ontario for 1996-2011 by rural-urban status. A: Rates of diabetes-related ED-visits. B: Rates of diabetes-related hospitalizations. Crude rate rural, white squares; projected adjusted rates rural, dotted line; predicted adjusted rural, black squares; crude rate urban, white circles; projected adjusted rates urban, dashed line; predicted adjusted rates urban, black circles.

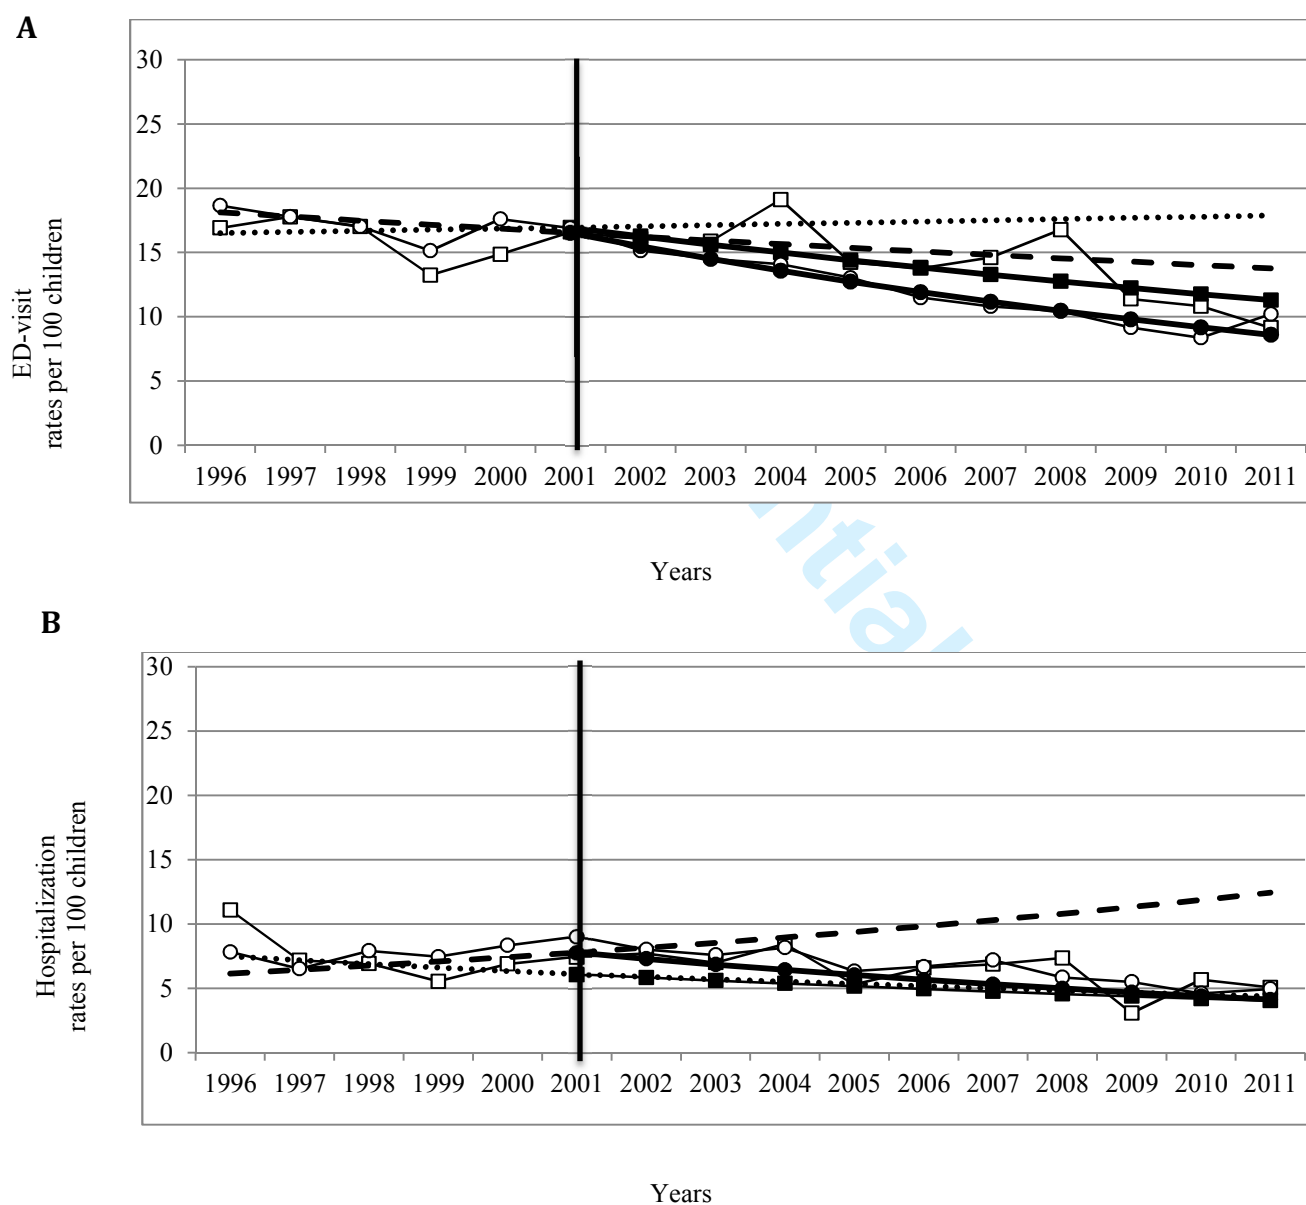

The RECORD statement – checklist of items, extended from the STROBE statement, that should be reported in observational studies using routinely collected health data.

|                           | Item No. | STROBE items                                                                                                                                                                               | Location in manuscript where items are reported | RECORD items                                                                                                                                                                                                                                                                                                                                                                                                                                | Location in manuscript where items are reported  |
|---------------------------|----------|--------------------------------------------------------------------------------------------------------------------------------------------------------------------------------------------|-------------------------------------------------|---------------------------------------------------------------------------------------------------------------------------------------------------------------------------------------------------------------------------------------------------------------------------------------------------------------------------------------------------------------------------------------------------------------------------------------------|--------------------------------------------------|
| <b>Title and abstract</b> |          |                                                                                                                                                                                            |                                                 |                                                                                                                                                                                                                                                                                                                                                                                                                                             |                                                  |
|                           | 1        | (a) Indicate the study’s design with a commonly used term in the title or the abstract (b) Provide in the abstract an informative and balanced summary of what was done and what was found |                                                 | RECORD 1.1: The type of data used should be specified in the title or abstract. When possible, the name of the databases used should be included.<br><br>RECORD 1.2: If applicable, the geographic region and timeframe within which the study took place should be reported in the title or abstract.<br><br>RECORD 1.3: If linkage between databases was conducted for the study, this should be clearly stated in the title or abstract. | Abstract<br><br><br>Abstract<br><br><br>Abstract |
| <b>Introduction</b>       |          |                                                                                                                                                                                            |                                                 |                                                                                                                                                                                                                                                                                                                                                                                                                                             |                                                  |
| Background rationale      | 2        | Explain the scientific background and rationale for the investigation being reported                                                                                                       | Introduction, pages 4-5                         |                                                                                                                                                                                                                                                                                                                                                                                                                                             |                                                  |
| Objectives                | 3        | State specific objectives, including any prespecified hypotheses                                                                                                                           | Introduction, page 5, lines 25-32               |                                                                                                                                                                                                                                                                                                                                                                                                                                             |                                                  |
| <b>Methods</b>            |          |                                                                                                                                                                                            |                                                 |                                                                                                                                                                                                                                                                                                                                                                                                                                             |                                                  |
| Study Design              | 4        | Present key elements of study design early in the paper                                                                                                                                    | Methods, page 6, lines 8-13                     |                                                                                                                                                                                                                                                                                                                                                                                                                                             |                                                  |
| Setting                   | 5        | Describe the setting, locations, and relevant dates, including periods of recruitment, exposure, follow-up, and data collection                                                            | Methods, pages 6-7                              |                                                                                                                                                                                                                                                                                                                                                                                                                                             |                                                  |
| Participants              | 6        | (a) <i>Cohort study</i> - Give the eligibility criteria, and the                                                                                                                           |                                                 | RECORD 6.1: The methods of study population selection (such as codes or                                                                                                                                                                                                                                                                                                                                                                     | Methods, page 6, lines 22-53                     |

|                                                                                                                                           |                              |                                                                                                                                                                                                                                                                                                                                                                                                                                                                                                                                                                                                                                                             |                                                                                                                                                                                      |                                                                                                                                                                                                                                                                                                                                                                                                                                                                                                                                                                                                                              |                                                                                                           |
|-------------------------------------------------------------------------------------------------------------------------------------------|------------------------------|-------------------------------------------------------------------------------------------------------------------------------------------------------------------------------------------------------------------------------------------------------------------------------------------------------------------------------------------------------------------------------------------------------------------------------------------------------------------------------------------------------------------------------------------------------------------------------------------------------------------------------------------------------------|--------------------------------------------------------------------------------------------------------------------------------------------------------------------------------------|------------------------------------------------------------------------------------------------------------------------------------------------------------------------------------------------------------------------------------------------------------------------------------------------------------------------------------------------------------------------------------------------------------------------------------------------------------------------------------------------------------------------------------------------------------------------------------------------------------------------------|-----------------------------------------------------------------------------------------------------------|
| 1<br>2<br>3<br>4<br>5<br>6<br>7<br>8<br>9<br>10<br>11<br>12<br>13<br>14<br>15<br>16<br>17<br>18<br>19<br>20<br>21<br>22<br>23<br>24<br>25 |                              | <p>sources and methods of selection of participants. Describe methods of follow-up</p> <p><i>Case-control study</i> - Give the eligibility criteria, and the sources and methods of case ascertainment and control selection. Give the rationale for the choice of cases and controls</p> <p><i>Cross-sectional study</i> - Give the eligibility criteria, and the sources and methods of selection of participants</p> <p>(b) <i>Cohort study</i> - For matched studies, give matching criteria and number of exposed and unexposed</p> <p><i>Case-control study</i> - For matched studies, give matching criteria and the number of controls per case</p> |                                                                                                                                                                                      | <p>algorithms used to identify subjects) should be listed in detail. If this is not possible, an explanation should be provided.</p> <p>RECORD 6.2: Any validation studies of the codes or algorithms used to select the population should be referenced. If validation was conducted for this study and not published elsewhere, detailed methods and results should be provided.</p> <p>RECORD 6.3: If the study involved linkage of databases, consider use of a flow diagram or other graphical display to demonstrate the data linkage process, including the number of individuals with linked data at each stage.</p> | <p>Methods, page 6 and reference #16</p> <p>Linkage and databases used described in Methods, page 6-7</p> |
| 26<br>27<br>28<br>29<br>30<br>31<br>32                                                                                                    | Variables                    | 7                                                                                                                                                                                                                                                                                                                                                                                                                                                                                                                                                                                                                                                           | Clearly define all outcomes, exposures, predictors, potential confounders, and effect modifiers. Give diagnostic criteria, if applicable.                                            | RECORD 7.1: A complete list of codes and algorithms used to classify exposures, outcomes, confounders, and effect modifiers should be provided. If these cannot be reported, an explanation should be provided.                                                                                                                                                                                                                                                                                                                                                                                                              | Methods, page 7                                                                                           |
| 33<br>34<br>35<br>36<br>37<br>38<br>39<br>40<br>41                                                                                        | Data sources/<br>measurement | 8                                                                                                                                                                                                                                                                                                                                                                                                                                                                                                                                                                                                                                                           | For each variable of interest, give sources of data and details of methods of assessment (measurement). Describe comparability of assessment methods if there is more than one group | Methods, page 7, lines 6-48                                                                                                                                                                                                                                                                                                                                                                                                                                                                                                                                                                                                  |                                                                                                           |
| 42<br>43                                                                                                                                  | Bias                         | 9                                                                                                                                                                                                                                                                                                                                                                                                                                                                                                                                                                                                                                                           | Describe any efforts to address potential sources of bias                                                                                                                            | Methods, page 7, lines 29-48                                                                                                                                                                                                                                                                                                                                                                                                                                                                                                                                                                                                 |                                                                                                           |
| 44<br>45                                                                                                                                  | Study size                   | 10                                                                                                                                                                                                                                                                                                                                                                                                                                                                                                                                                                                                                                                          | Explain how the study size was                                                                                                                                                       | Methods, Page 6,                                                                                                                                                                                                                                                                                                                                                                                                                                                                                                                                                                                                             |                                                                                                           |

46  
47  
48  
49

1  
2  
3  
4  
5  
6  
7  
8  
9  
10  
11  
12  
13  
14  
15  
16  
17  
18  
19  
20  
21  
22  
23  
24  
25  
26  
27  
28  
29  
30  
31  
32  
33  
34  
35  
36  
37  
38  
39  
40  
41  
42  
43  
44  
45  
46  
47  
48  
49

|                                  |    |                                                                                                                                                                                                                                                                                                                                                                                                                                                                                                                                                                      |                                                                                                               |                                                                                                                                                                                                                                                          |                                                                 |
|----------------------------------|----|----------------------------------------------------------------------------------------------------------------------------------------------------------------------------------------------------------------------------------------------------------------------------------------------------------------------------------------------------------------------------------------------------------------------------------------------------------------------------------------------------------------------------------------------------------------------|---------------------------------------------------------------------------------------------------------------|----------------------------------------------------------------------------------------------------------------------------------------------------------------------------------------------------------------------------------------------------------|-----------------------------------------------------------------|
|                                  |    | arrived at                                                                                                                                                                                                                                                                                                                                                                                                                                                                                                                                                           | lines 22-34                                                                                                   |                                                                                                                                                                                                                                                          |                                                                 |
| Quantitative variables           | 11 | Explain how quantitative variables were handled in the analyses. If applicable, describe which groupings were chosen, and why                                                                                                                                                                                                                                                                                                                                                                                                                                        | Methods, page 8, lines 22-50                                                                                  |                                                                                                                                                                                                                                                          |                                                                 |
| Statistical methods              | 12 | (a) Describe all statistical methods, including those used to control for confounding<br>(b) Describe any methods used to examine subgroups and interactions<br>(c) Explain how missing data were addressed<br>(d) <i>Cohort study</i> - If applicable, explain how loss to follow-up was addressed<br><i>Case-control study</i> - If applicable, explain how matching of cases and controls was addressed<br><i>Cross-sectional study</i> - If applicable, describe analytical methods taking account of sampling strategy<br>(e) Describe any sensitivity analyses | Methods, pages 8-9<br><br>Methods, page 8, lines 34-51 and page 9, lines 9-25<br>Methods, page 6, lines 51-53 |                                                                                                                                                                                                                                                          |                                                                 |
| Data access and cleaning methods |    | ..                                                                                                                                                                                                                                                                                                                                                                                                                                                                                                                                                                   |                                                                                                               | RECORD 12.1: Authors should describe the extent to which the investigators had access to the database population used to create the study population.<br>RECORD 12.2: Authors should provide information on the data cleaning methods used in the study. | Methods, page 6, lines 8-34<br><br>Methods, page 6, lines 22-53 |
| Linkage                          |    | ..                                                                                                                                                                                                                                                                                                                                                                                                                                                                                                                                                                   |                                                                                                               | RECORD 12.3: State whether the study included person-level, institutional-level, or other data linkage across two                                                                                                                                        | Methods, page 6, lines 34-53                                    |

|                  |    |                                                                                                                                                                                                                                                                                                                                                 |                                                                           |                                                                                                                                                                                                                                                                                                                    |                              |
|------------------|----|-------------------------------------------------------------------------------------------------------------------------------------------------------------------------------------------------------------------------------------------------------------------------------------------------------------------------------------------------|---------------------------------------------------------------------------|--------------------------------------------------------------------------------------------------------------------------------------------------------------------------------------------------------------------------------------------------------------------------------------------------------------------|------------------------------|
|                  |    |                                                                                                                                                                                                                                                                                                                                                 |                                                                           | or more databases. The methods of linkage and methods of linkage quality evaluation should be provided.                                                                                                                                                                                                            |                              |
| <b>Results</b>   |    |                                                                                                                                                                                                                                                                                                                                                 |                                                                           |                                                                                                                                                                                                                                                                                                                    |                              |
| Participants     | 13 | (a) Report the numbers of individuals at each stage of the study ( <i>e.g.</i> , numbers potentially eligible, examined for eligibility, confirmed eligible, included in the study, completing follow-up, and analysed)<br>(b) Give reasons for non-participation at each stage.<br>(c) Consider use of a flow diagram                          |                                                                           | RECORD 13.1: Describe in detail the selection of the persons included in the study ( <i>i.e.</i> , study population selection) including filtering based on data quality, data availability and linkage. The selection of included persons can be described in the text and/or by means of the study flow diagram. | Methods, page 6, lines 22-53 |
| Descriptive data | 14 | (a) Give characteristics of study participants ( <i>e.g.</i> , demographic, clinical, social) and information on exposures and potential confounders<br>(b) Indicate the number of participants with missing data for each variable of interest<br>(c) <i>Cohort study</i> - summarise follow-up time ( <i>e.g.</i> , average and total amount) | Results, page 9, line 36<br><br>Results, page 9, lines 37-39              |                                                                                                                                                                                                                                                                                                                    |                              |
| Outcome data     | 15 | <i>Cohort study</i> - Report numbers of outcome events or summary measures over time<br><i>Case-control study</i> - Report numbers in each exposure category, or summary measures of exposure<br><i>Cross-sectional study</i> - Report numbers of outcome events or summary measures                                                            | Results, page 9, lines 46-53 and page 10, lines 46-53, Figures 1, 2 and 3 |                                                                                                                                                                                                                                                                                                                    |                              |
| Main results     | 16 | (a) Give unadjusted estimates and, if applicable, confounder-                                                                                                                                                                                                                                                                                   | Results, page 9, lines 46-53 and page 10,                                 |                                                                                                                                                                                                                                                                                                                    |                              |



1  
2  
3  
4  
5  
6  
7  
8  
9  
10  
11  
12  
13  
14  
15  
16  
17  
18  
19  
20  
21  
22  
23  
24  
25  
26  
27  
28  
29  
30  
31  
32  
33  
34  
35  
36  
37  
38  
39  
40  
41  
42  
43  
44  
45  
46  
47  
48  
49

|                          |    |                                                                                                                                                                                                                                                                                                                                                    |                                                                            |                                                                                                                                                                                                                                                                                                          |                                      |
|--------------------------|----|----------------------------------------------------------------------------------------------------------------------------------------------------------------------------------------------------------------------------------------------------------------------------------------------------------------------------------------------------|----------------------------------------------------------------------------|----------------------------------------------------------------------------------------------------------------------------------------------------------------------------------------------------------------------------------------------------------------------------------------------------------|--------------------------------------|
|                          |    | adjusted estimates and their precision (e.g., 95% confidence interval). Make clear which confounders were adjusted for and why they were included<br>(b) Report category boundaries when continuous variables were categorized<br>(c) If relevant, consider translating estimates of relative risk into absolute risk for a meaningful time period | lines 46-53, Tables 1 and 2<br><br>Methods, page 7, lines 34-47<br><br>N/A |                                                                                                                                                                                                                                                                                                          |                                      |
| Other analyses           | 17 | Report other analyses done—e.g., analyses of subgroups and interactions, and sensitivity analyses                                                                                                                                                                                                                                                  | N/A                                                                        |                                                                                                                                                                                                                                                                                                          |                                      |
| <b>Discussion</b>        |    |                                                                                                                                                                                                                                                                                                                                                    |                                                                            |                                                                                                                                                                                                                                                                                                          |                                      |
| Key results              | 18 | Summarise key results with reference to study objectives                                                                                                                                                                                                                                                                                           | Interpretation, pages 11-12                                                |                                                                                                                                                                                                                                                                                                          |                                      |
| Limitations              | 19 | Discuss limitations of the study, taking into account sources of potential bias or imprecision. Discuss both direction and magnitude of any potential bias                                                                                                                                                                                         |                                                                            | RECORD 19.1: Discuss the implications of using data that were not created or collected to answer the specific research question(s). Include discussion of misclassification bias, unmeasured confounding, missing data, and changing eligibility over time, as they pertain to the study being reported. | Interpretation, page 14, lines 11-51 |
| Interpretation           | 20 | Give a cautious overall interpretation of results considering objectives, limitations, multiplicity of analyses, results from similar studies, and other relevant evidence                                                                                                                                                                         | Interpretation, pages 11-15                                                |                                                                                                                                                                                                                                                                                                          |                                      |
| Generalisability         | 21 | Discuss the generalisability (external validity) of the study results                                                                                                                                                                                                                                                                              | Interpretation, page 15, lines 3-8                                         |                                                                                                                                                                                                                                                                                                          |                                      |
| <b>Other Information</b> |    |                                                                                                                                                                                                                                                                                                                                                    |                                                                            |                                                                                                                                                                                                                                                                                                          |                                      |

|                                                           |    |                                                                                                                                                               |                  |                                                                                                                                                          |                            |
|-----------------------------------------------------------|----|---------------------------------------------------------------------------------------------------------------------------------------------------------------|------------------|----------------------------------------------------------------------------------------------------------------------------------------------------------|----------------------------|
| Funding                                                   | 22 | Give the source of funding and the role of the funders for the present study and, if applicable, for the original study on which the present article is based | Acknowledgements |                                                                                                                                                          |                            |
| Accessibility of protocol, raw data, and programming code |    | ..                                                                                                                                                            |                  | RECORD 22.1: Authors should provide information on how to access any supplemental information such as the study protocol, raw data, or programming code. | Author contact information |

\*Reference: Benchimol EI, Smeeth L, Guttman A, Harron K, Moher D, Petersen I, Sørensen HT, von Elm E, Langan SM, the RECORD Working Committee. The REporting of studies Conducted using Observational Routinely-collected health Data (RECORD) Statement. *PLoS Medicine* 2015; in press.

\*Checklist is protected under Creative Commons Attribution ([CC BY](https://creativecommons.org/licenses/by/4.0/)) license.
